# Supplementary material
Source: PubMed Central journal article supplement (PMC5442630)
Supplement: IAI.00937-16_zii999092062s1.pdf [file IAI.00937-16_zii999092062s1.pdf]

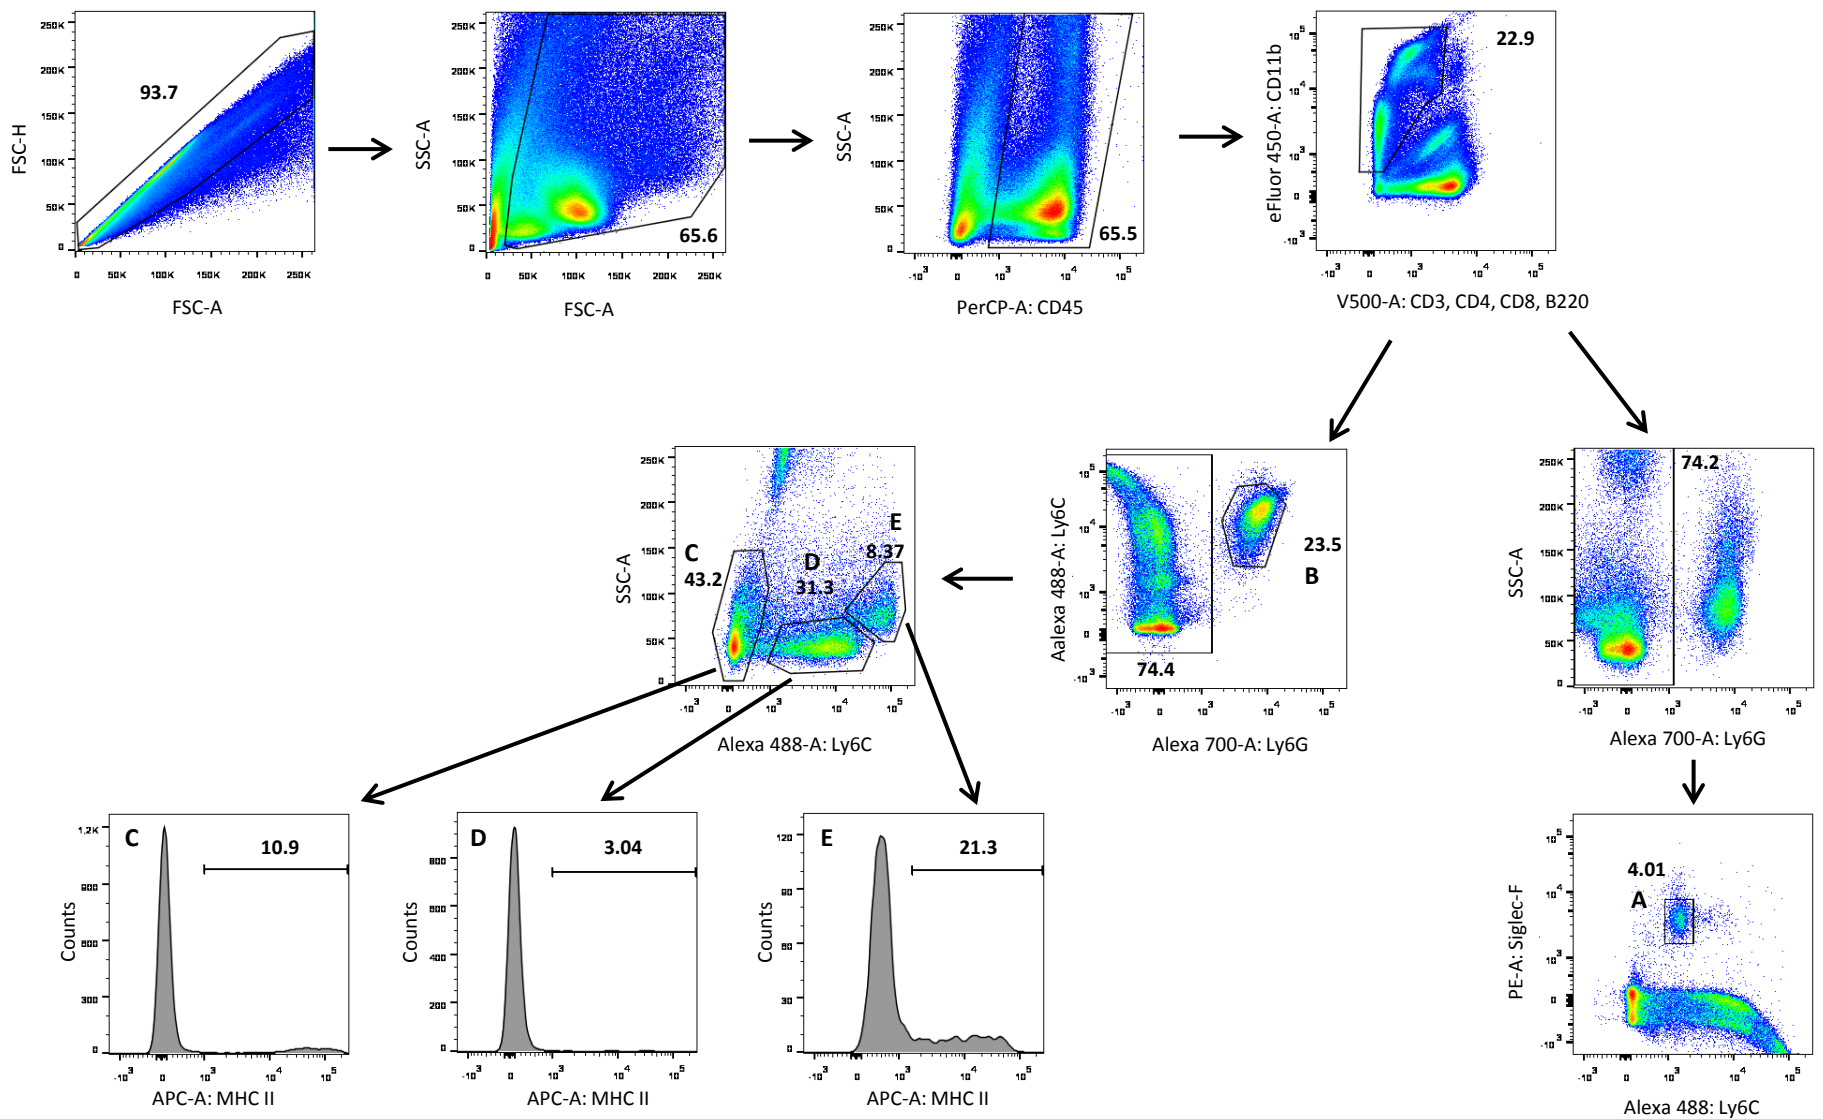

**FIG S1** Immunophenotyping of myeloid cell subsets in BALB/c mouse lungs. Doublets (FSC-H vs. FSC-A), debris (SSC-A vs. FSC-A) and non-leukocyte cells (SSC-A vs. CD45) were excluded. CD11b<sup>+</sup> Lineage<sup>-</sup> cells (gated out using a dump channel: CD3, CD4, CD8, B220) were then divided on eosinophil population (A; Ly6G<sup>+</sup>Ly6C<sup>int</sup>SiglecF<sup>+</sup>), neutrophil population (B; Ly6G<sup>+</sup>Ly6C<sup>+</sup>), macrophage population (C; Ly6C<sup>-</sup>), Ly6C<sup>int</sup> and Ly6C<sup>high</sup> monocyte populations (D and E, respectively). Populations C, D, E were then further examined for their surface expression of MHC II molecule. Frequencies of cells in each gate are expressed as a percentage of cells.

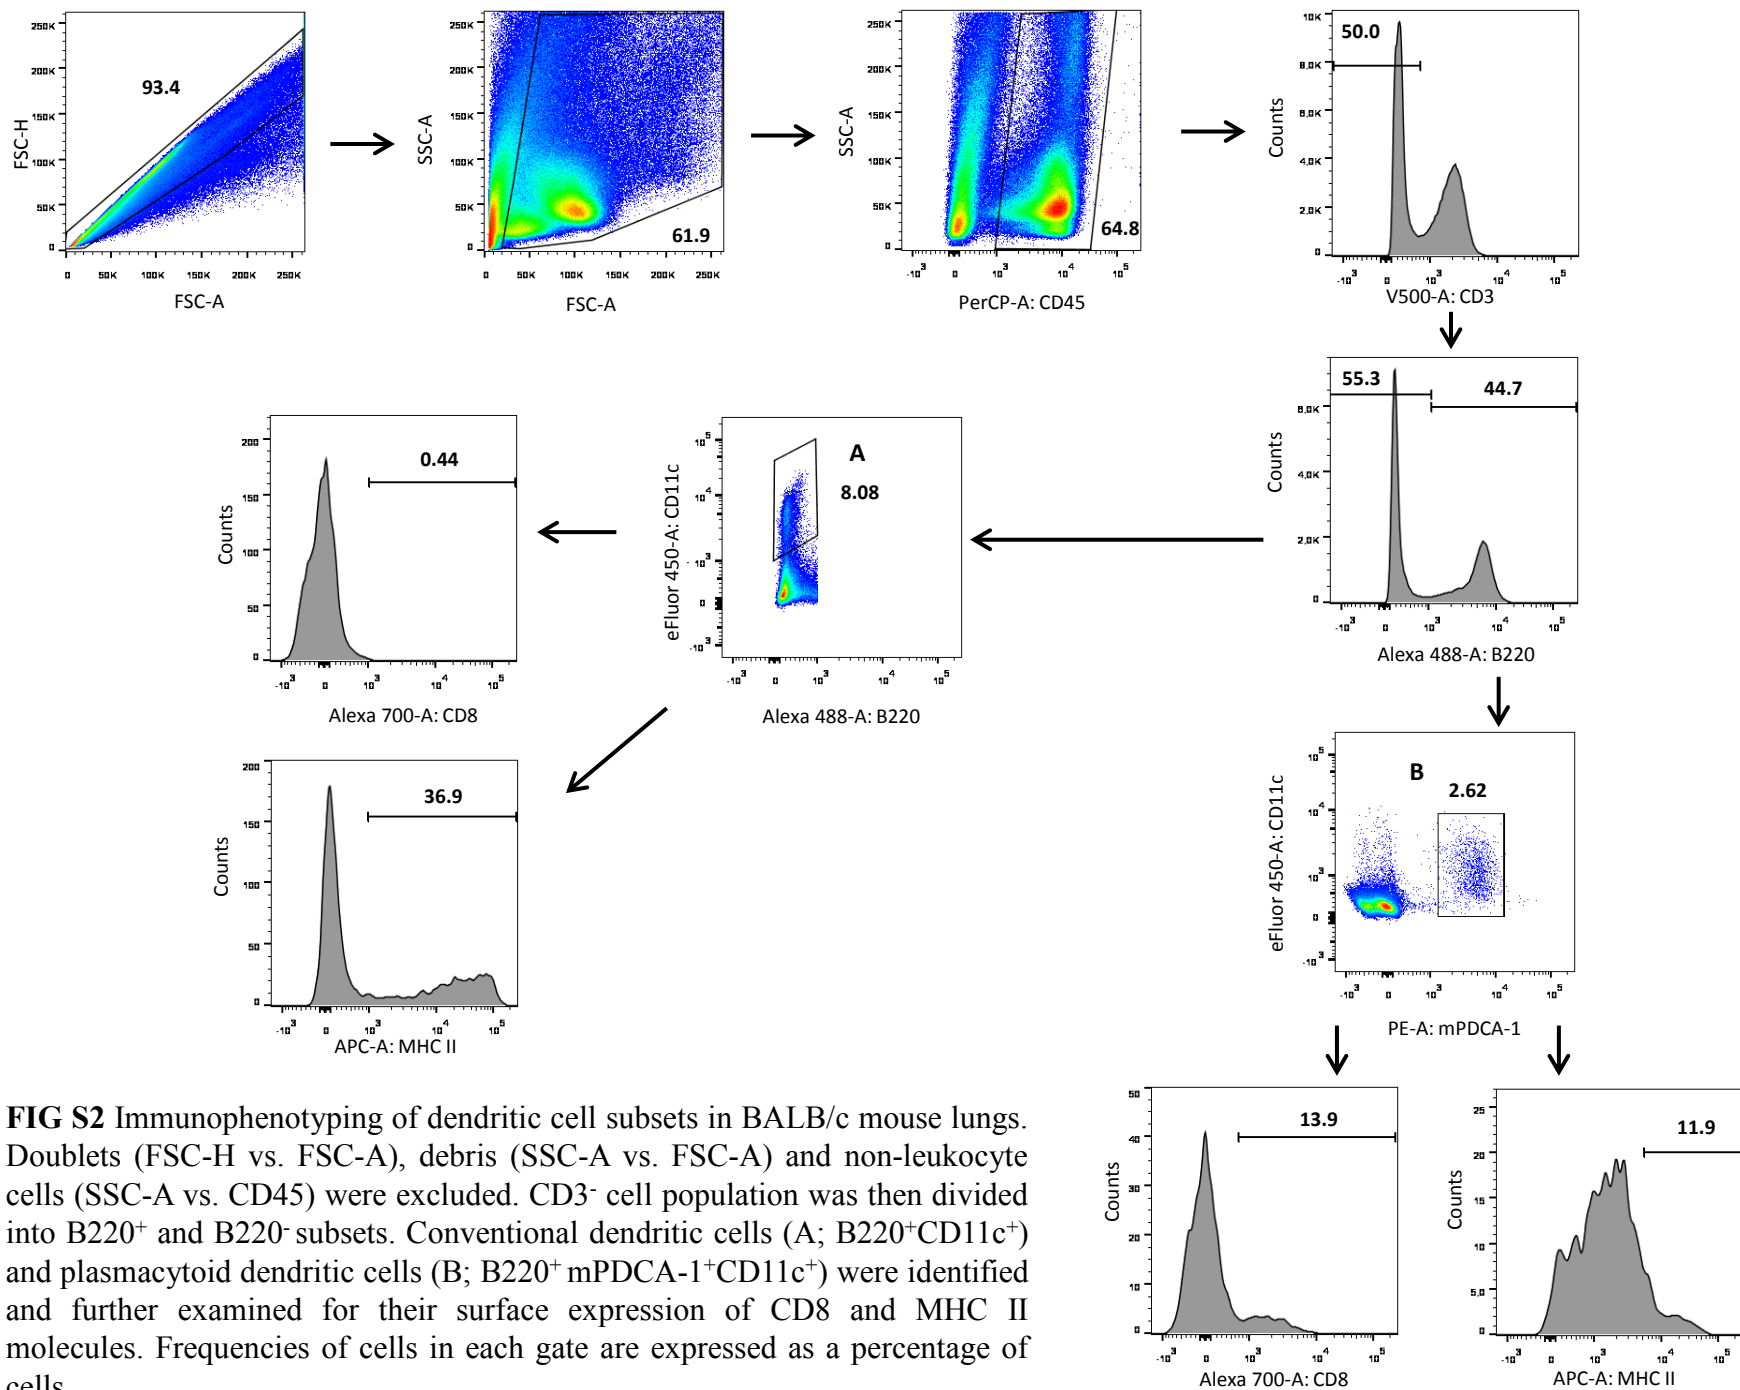

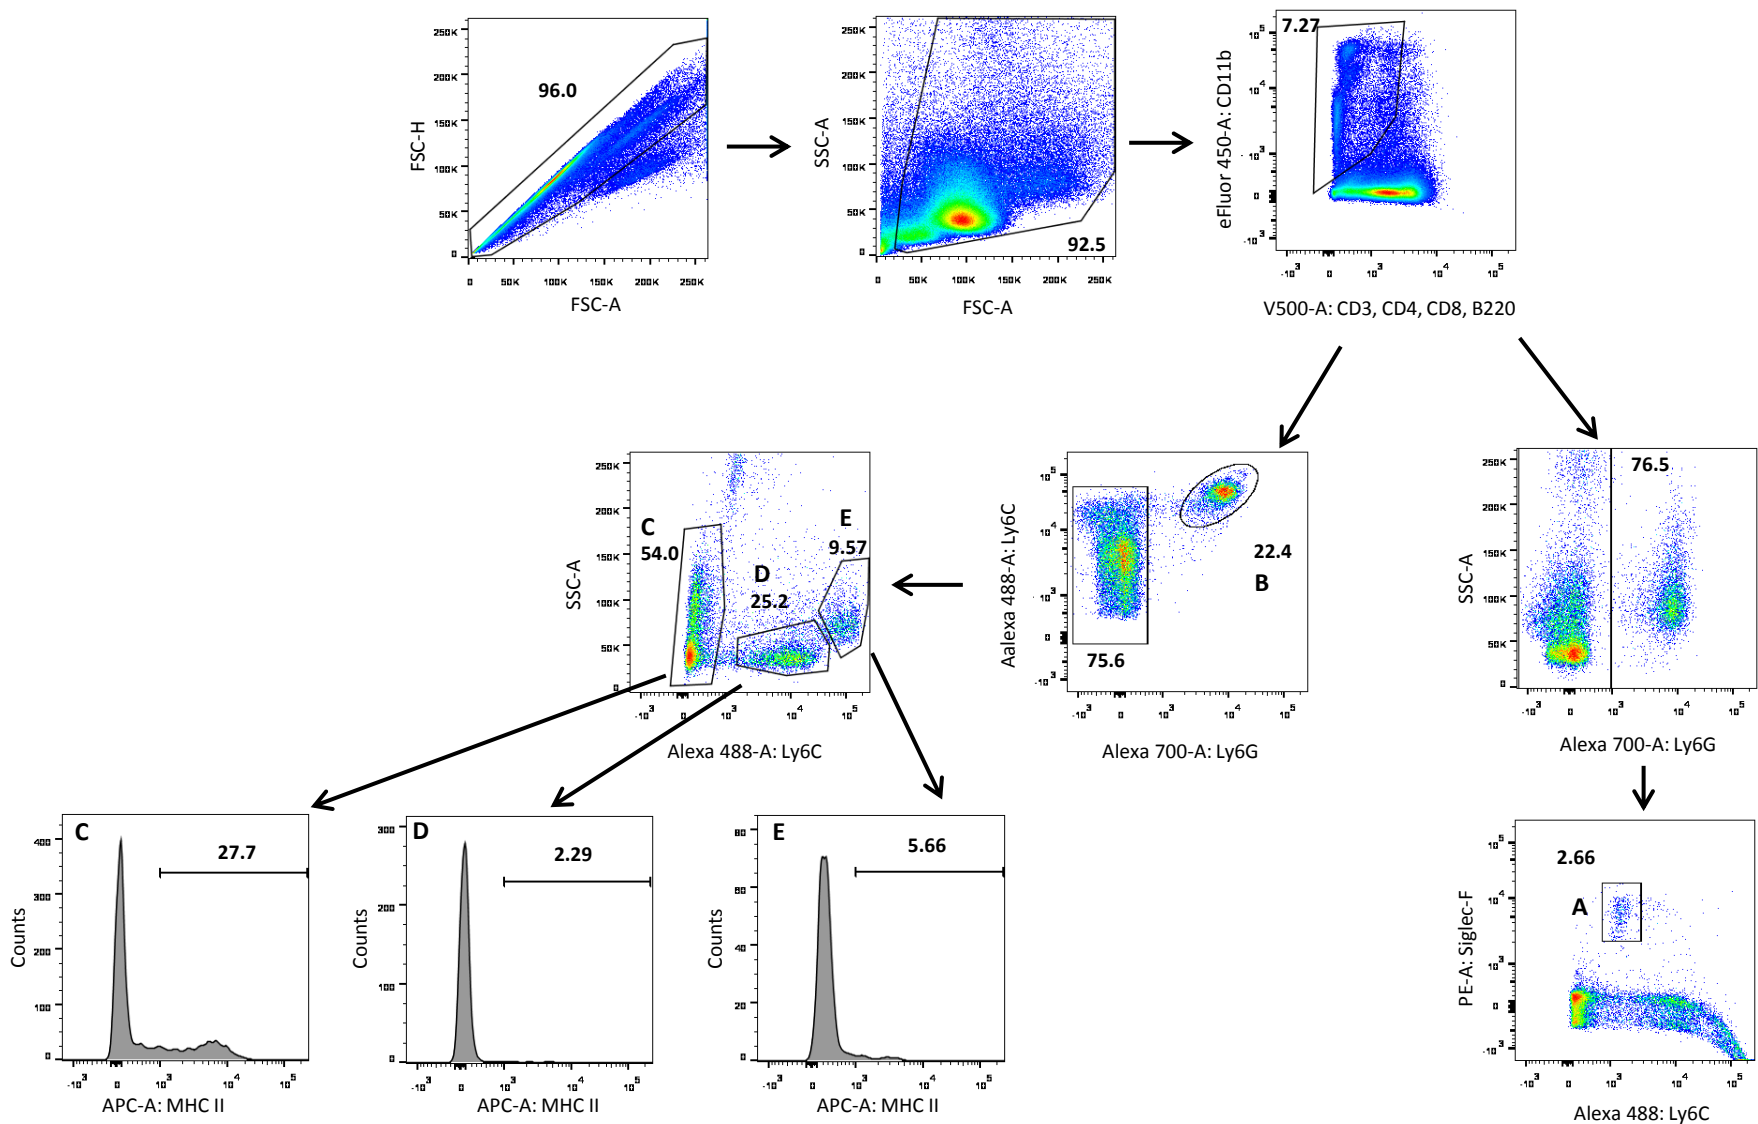

**FIG S3** Immunophenotyping of myeloid cell subsets in BALB/c mouse spleens. Doublets (FSC-H vs. FSC-A) and debris (SSC-A vs. FSC-A) were excluded. CD11b<sup>+</sup> Lineage<sup>-</sup> cells (gated out using a dump channel: CD3, CD4, CD8, B220) were then divided on eosinophil population (A; Ly6G<sup>-</sup>Ly6C<sup>int</sup>Siglec-F<sup>+</sup>), neutrophil population (B; Ly6G<sup>+</sup>Ly6C<sup>+</sup>), macrophage population (C; Ly6C<sup>-</sup>), Ly6C<sup>int</sup> and Ly6C<sup>high</sup> monocyte populations (D and E, respectively). Populations C, D, E were then further examined for their surface expression of MHC II molecule. Frequencies of cells in each gate are expressed as a percentage of cells.

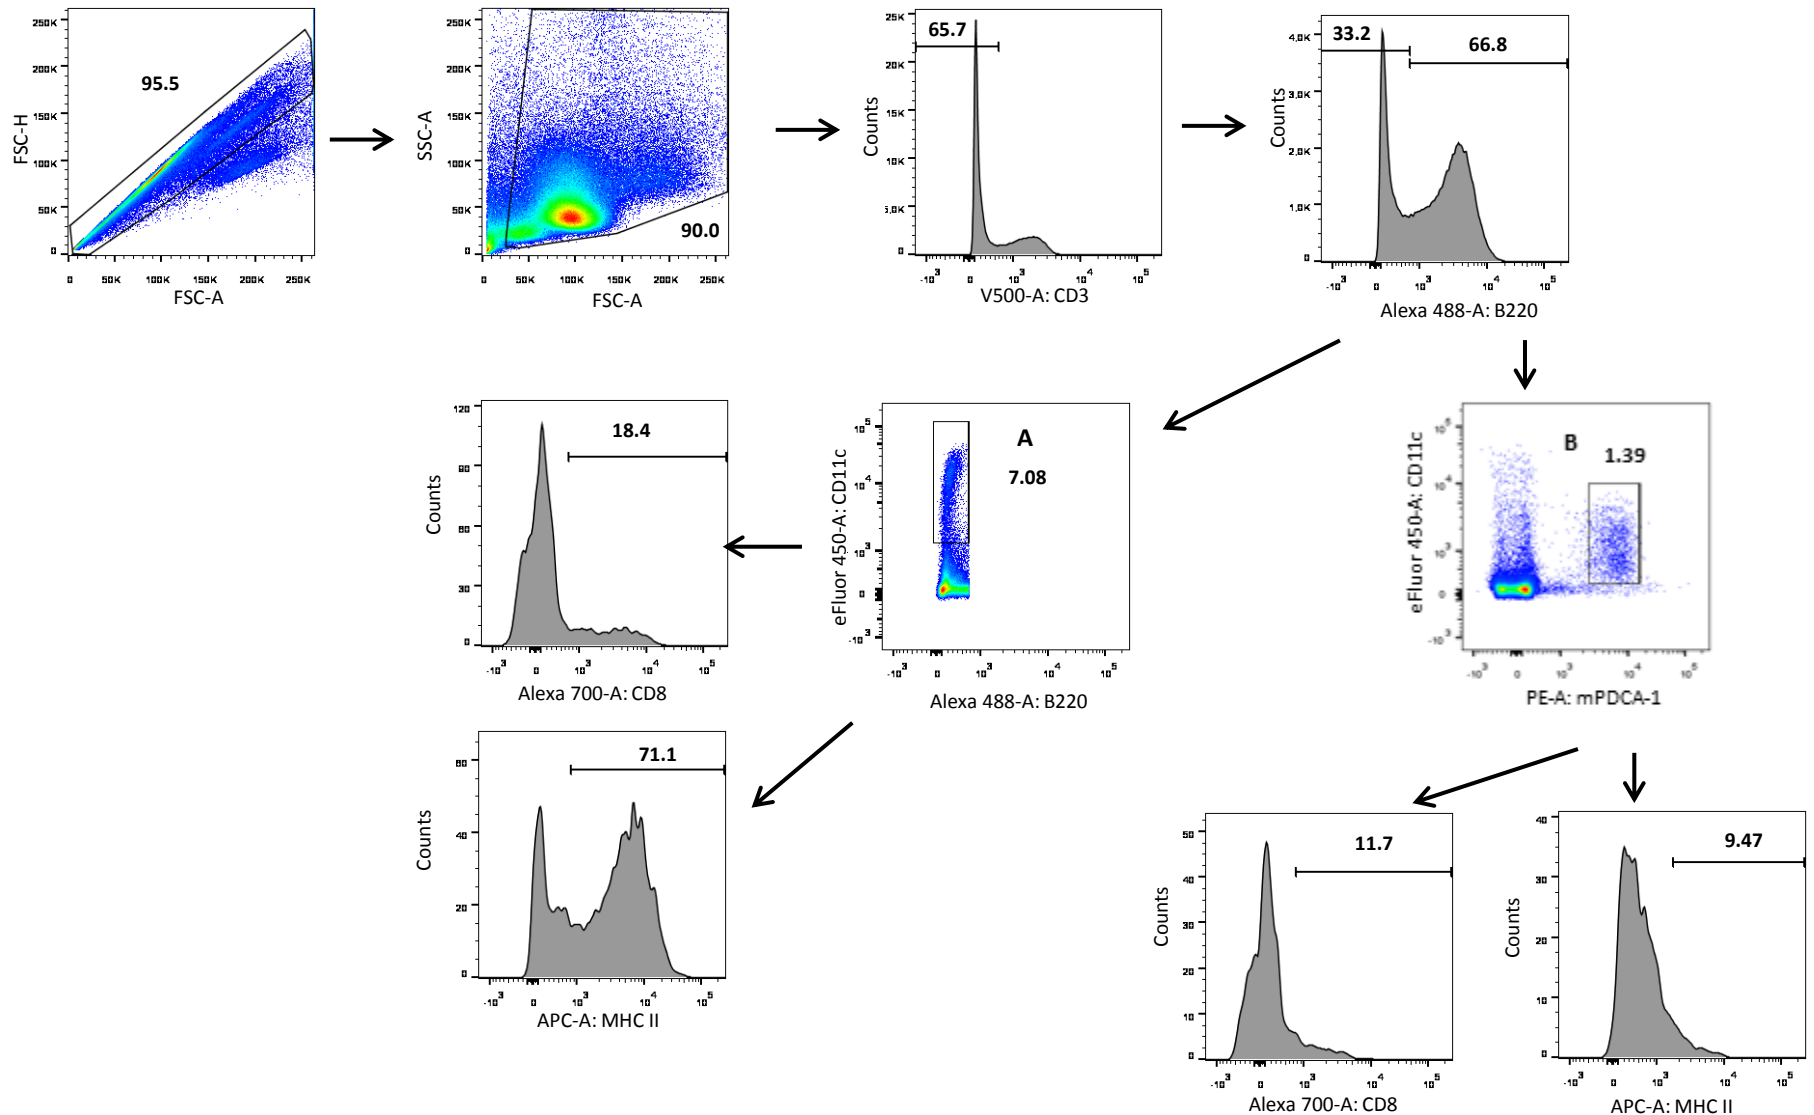

**FIG S4** Immunophenotyping of dendritic cell subsets in BALB/c mouse spleens. Doublets (FSC-H vs. FSC-A) and debris (SSC-A vs. FSC-A) were excluded. CD3<sup>+</sup> cell population was then divided into B220<sup>+</sup> and B220<sup>-</sup> subsets. Conventional dendritic cells (A; B220<sup>+</sup>CD11c<sup>+</sup>) and plasmacytoid dendritic cells (B; B220<sup>+</sup>mPDCA-1<sup>+</sup>CD11c<sup>+</sup>) were identified and further examined for their surface expression of CD8 and MHC II molecules. Frequencies of cells in each gate are expressed as a percentage of cells.

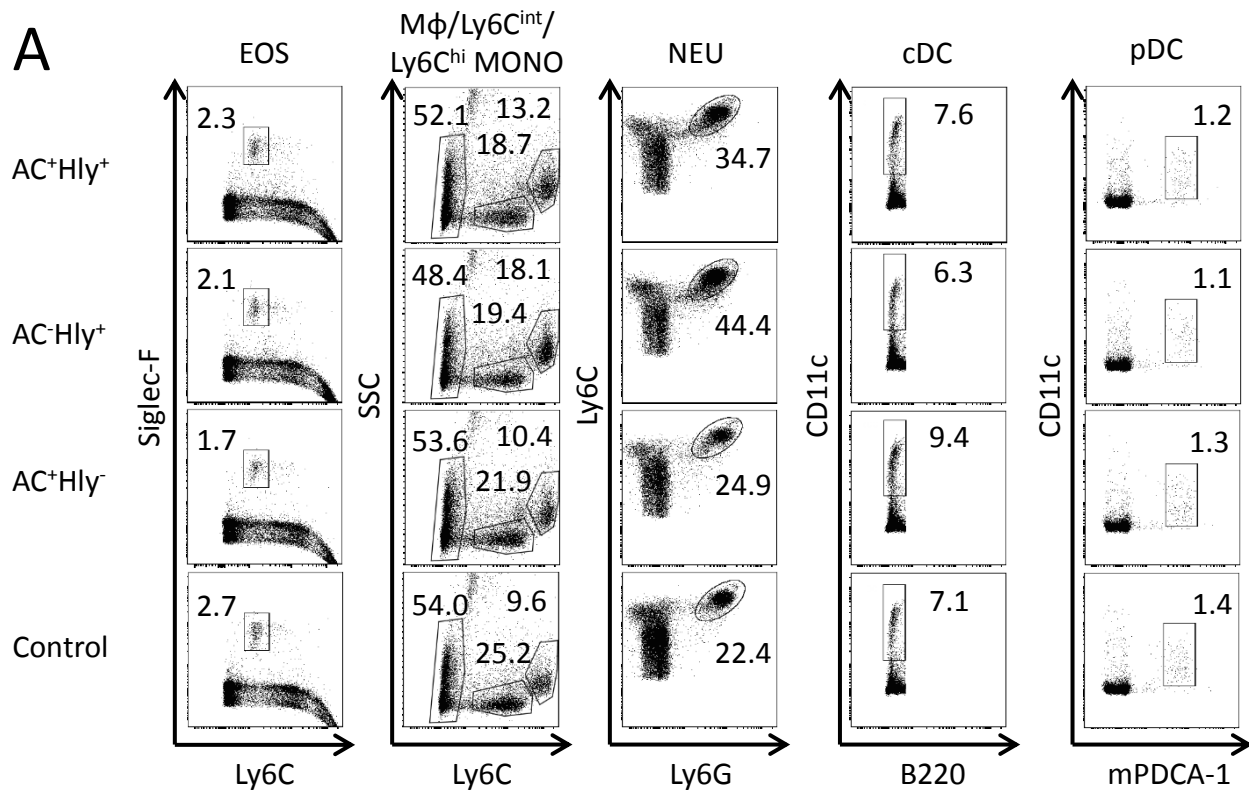

**FIG S5** Selected cell subsets distribution in spleens of mice infected with *Bordetella pertussis* 6 days after infection with  $1.5 \times 10^5$  CFU of the various strains (AC<sup>+</sup>Hly<sup>+</sup>, AC<sup>-</sup>Hly<sup>+</sup>, AC<sup>+</sup>Hly<sup>-</sup>) or with medium (Control). A) Dot plots of one representative mouse from each experimental group. B) Relative distribution of cell subsets in spleens in each experimental group ( $n=5$ ). Groups were compared using ANOVA followed by Tukey test for pairwise comparison of subgroups; \*, \*\*, \*\*\* represents p-value <0.05, 0.01 and 0.001, respectively. The experiment was repeated twice with similar results. EOS, eosinophils; M $\phi$ , macrophages; Ly6C<sup>int</sup> MONO and Ly6C<sup>hi</sup> MONO, monocytes; NEU, neutrophils; cDC, conventional dendritic cells; pDC, plasmacytoid dendritic cells.

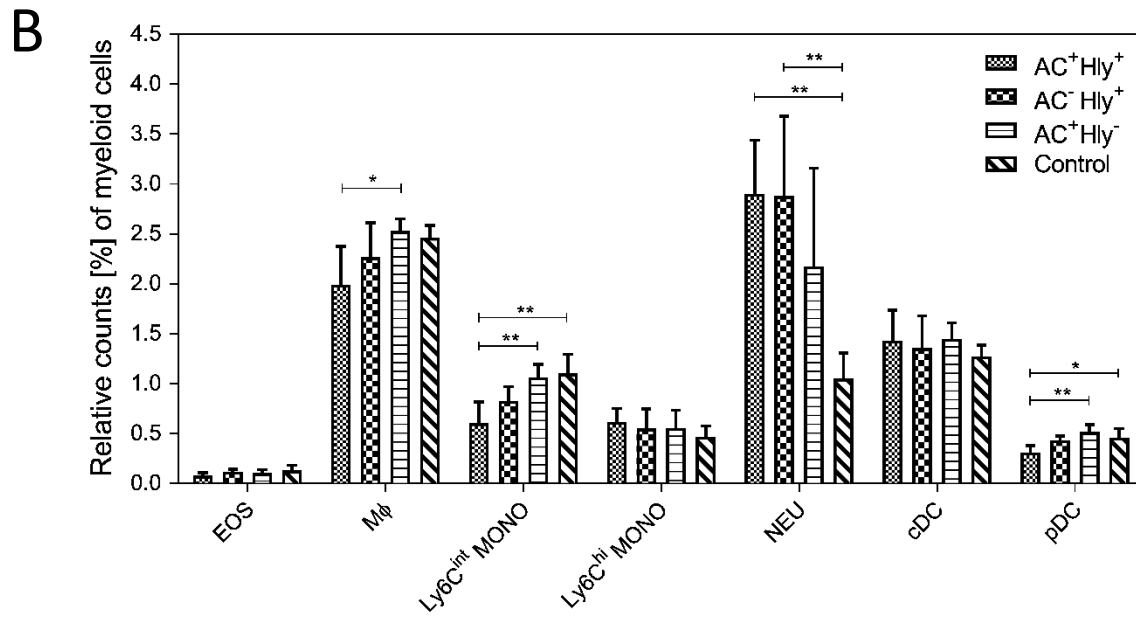

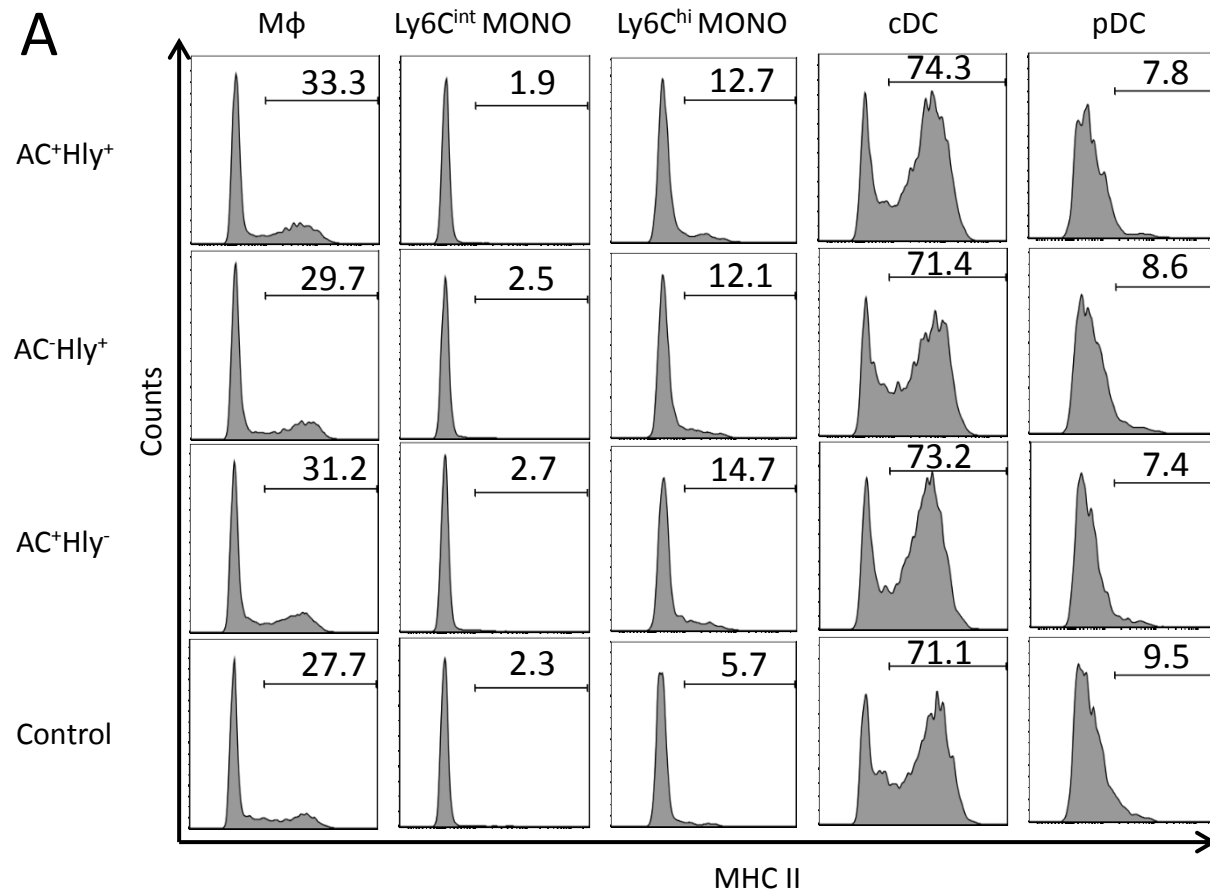

**FIG S6** Expression of MHC II on selected cell subsets in spleens of BALB/c mice infected with *Bordetella pertussis* 6 days after infection with  $1.5 \times 10^5$  CFU of the various strains (AC<sup>+</sup>Hly<sup>+</sup>, AC<sup>-</sup>Hly<sup>+</sup>, AC<sup>+</sup>Hly<sup>-</sup>) or with medium (Control). A) Histograms of one representative mouse from each experimental group. B) Relative distribution of MHC II expressing cell subsets in spleens in each experimental group ( $n=5$ ). C) Mean fluorescence intensity (MFI) of MHC II expression on selected cell subsets in spleens in each experimental group ( $n=5$ ). Groups were compared using ANOVA followed by Tukey test for pairwise comparison of sub-groups; \*, \*\*, \*\*\* represents p-value <0.05, 0.01 and 0.001, respectively. The experiment was repeated twice with similar results. Mφ, macrophages; Ly6C<sup>int</sup> MONO and Ly6C<sup>hi</sup> MONO, monocytes; cDC, conventional dendritic cells; pDC, plasmacytoid dendritic cells.

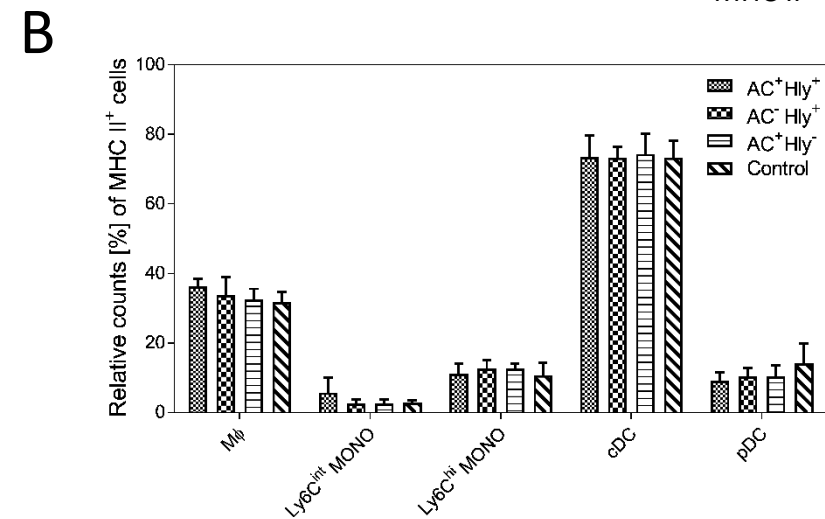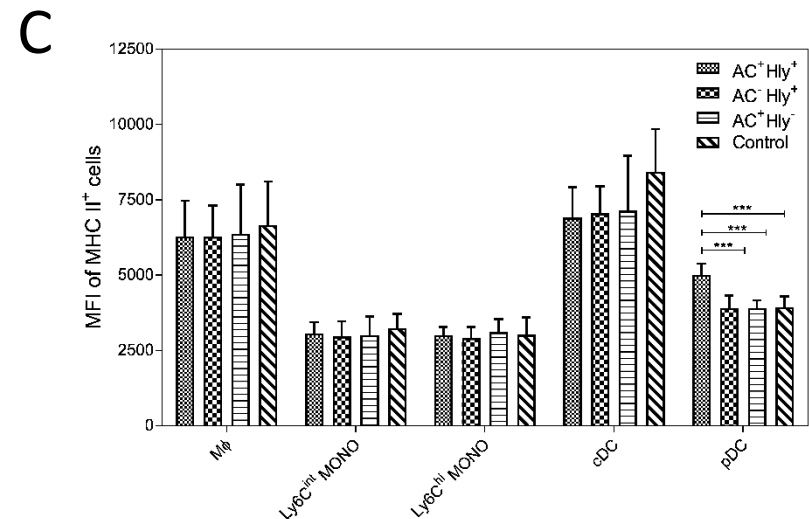

**A**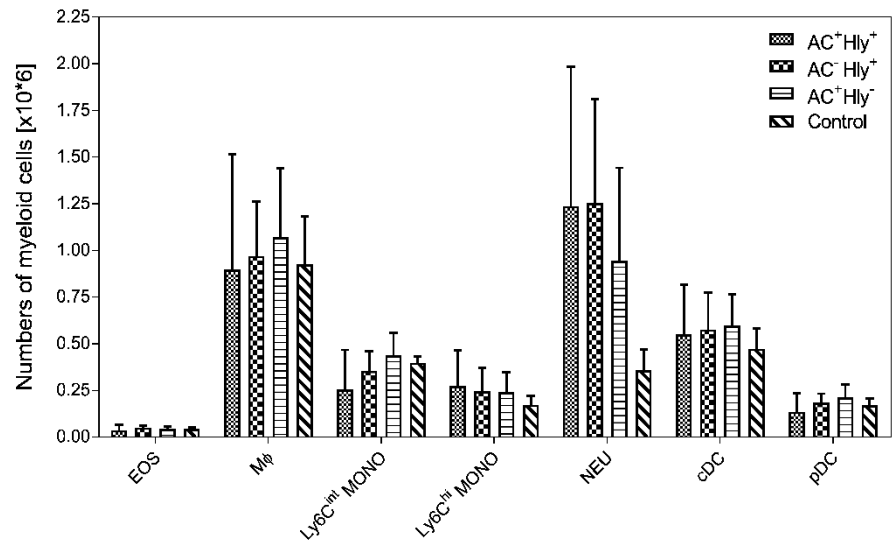**B**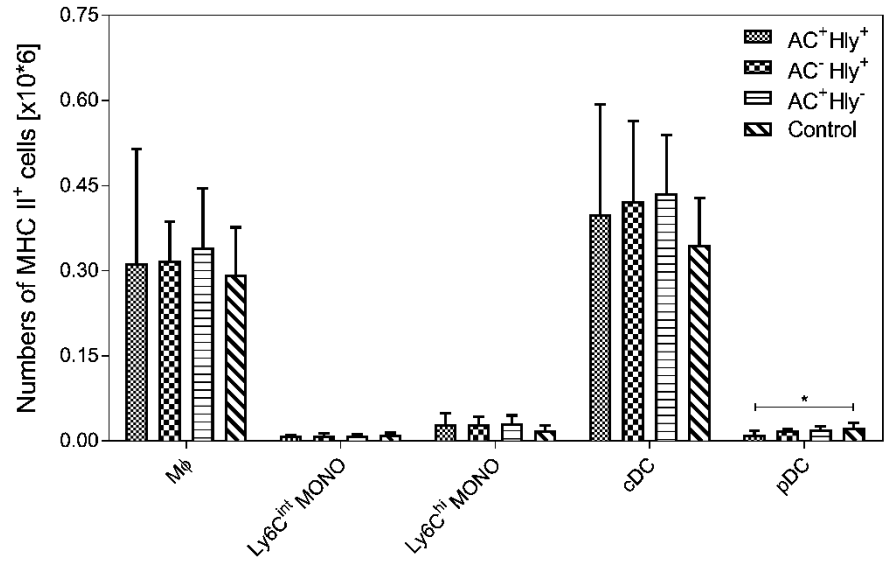

**FIG S7** Selected cell subsets distribution in lungs and spleens of BALB/c mice infected with *Bordetella pertussis* 6 days after infection with  $1.5 \times 10^5$  CFU of the various strains (AC<sup>+</sup>Hly<sup>+</sup>, AC<sup>-</sup>Hly<sup>+</sup>, AC<sup>+</sup>Hly<sup>-</sup>) or with medium (Control). A) Distribution of cell subsets in lungs (upper graph) and spleens (lower graph) in each experimental group ( $n=5$ ). B) Distribution of MHC II<sup>+</sup> cell in lungs (upper graph) and spleens (lower graph) in each experimental group ( $n=5$ ). Groups were compared using ANOVA followed by Tukey test for pairwise comparison of sub-groups; \*, \*\*, \*\*\* represents p-value <0.05, 0.01 and 0.001, respectively. The experiment was repeated twice with similar results. EOS, eosinophils; Mφ, macrophages; Ly6C<sup>int</sup> MONO and Ly6C<sup>hi</sup> MONO, monocytes; NEU, neutrophils; cDC, conventional dendritic cells; pDC, plasmacytoid dendritic cells.
